# Supplementary material
Source: PubMed Central journal article supplement (PMC2805453)
Supplement: NIHMS163334-supplement-1.pdf [file NIHMS163334-supplement-1.pdf]

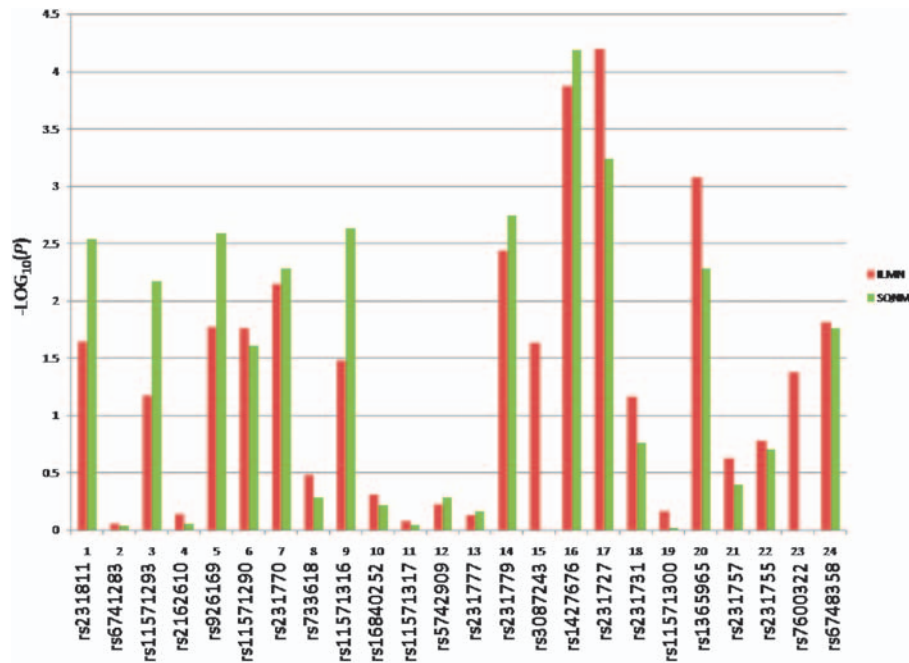

**Supplementary Figure 1** The T1D association of the 24 SNPs in the *CTLA4* locus.

Both genotyping methods have consistent T1D association results. The peak of T1D association is from rs1427676 and rs231727.

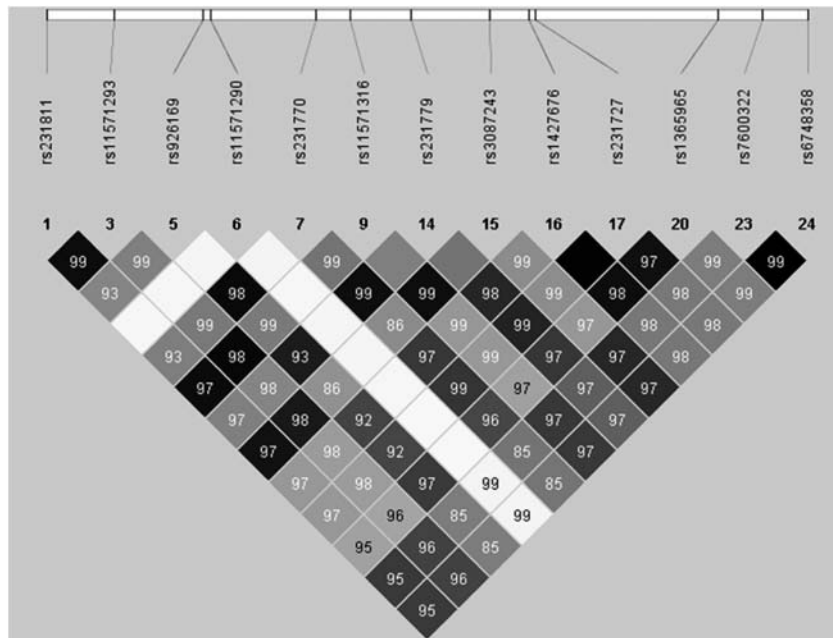

**Supplementary Figure 2** The LD map of the T1D-associated *CTLA4* SNPs based on

the *Illumina* genotyping data from the T1DGC. The two SNPs with highest T1D association, rs1427676 and rs231727, are in tight LD. Except rs11571290, all the other T1D-associated SNPs have high LD rs1427676 with  $r^2 \geq 0.299$ . The haplotype map is made by the Haploview v4.0 software.  $D'$  values (%) are shown in the boxes, and the empty boxes have  $D'=1$ . The grey scale represents the  $r^2$  values.
